# Supplementary material for: 4D seismic tomography unveiling velocity increase prior to seismic swarms at the Tatun volcano group of Taiwan
Source: Research Square preprint supplement (doi:10.21203/rs.3.rs-5675134/v1), 2025-05-02
Supplement: Supplementary file 1 [file c7314fb571d5e06d3fe64098.docx]

**Supplementary files for the manuscript below:**

4D seismic tomography unveiling velocity increase prior to seismic swarms at the Tatun volcano group of Taiwan

by

Hsin-Chieh Pu, Cheng-Horng Lin*, Ya-Chuan Lai, Min-Hung Shih, and Yi-Heng Li

(*) Corresponding author: Cheng-Horng Lin

Email: lin@earth.sinica.edu.tw

Tel: 886-2-27839910 ext. 1521

Fax: 886-2-27839159

Submitted to ***Scientific Reports***

on Dec. 20, 2024

revised on Feb. 13, 2025

revised on April 22, 2025


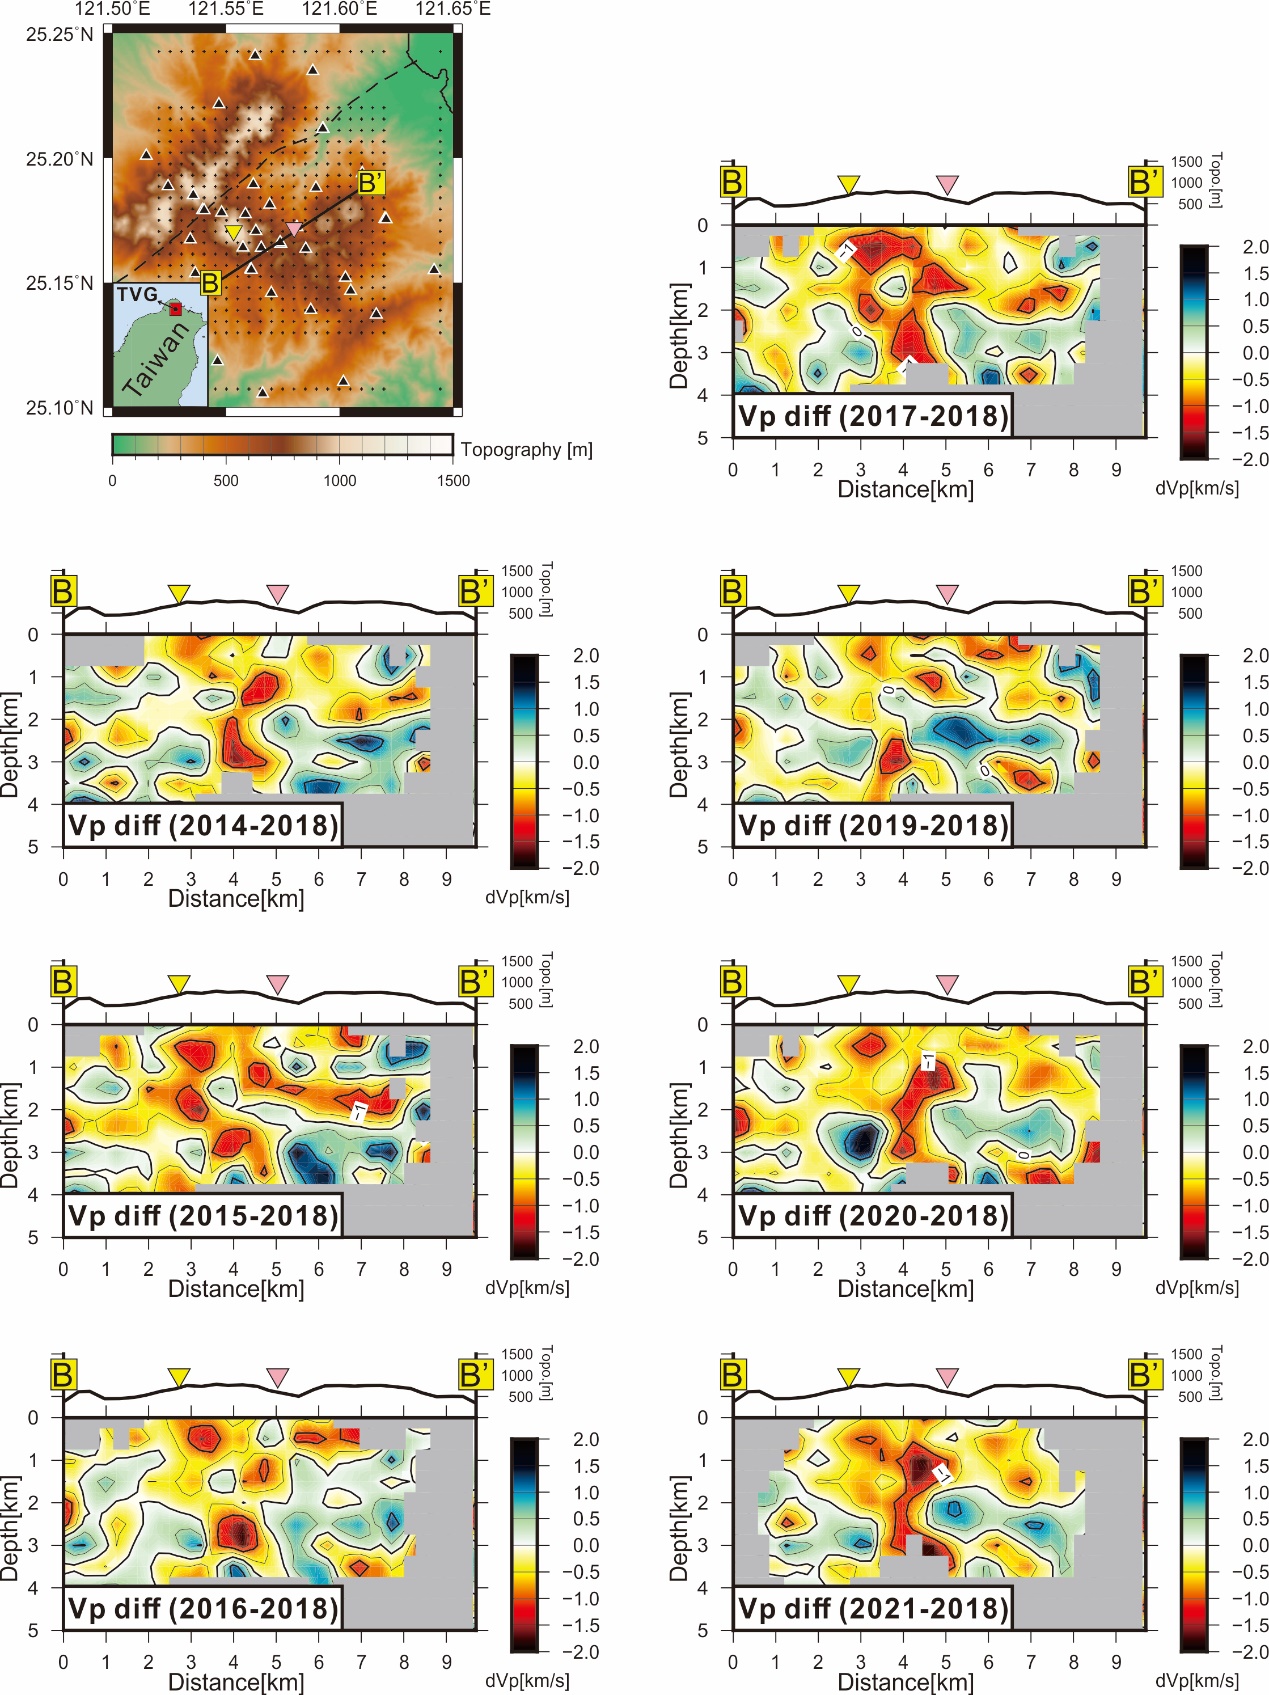


**Figure A1.** P-wave velocity differences between 2018 and each of the other years along the B-B’ profile.

*
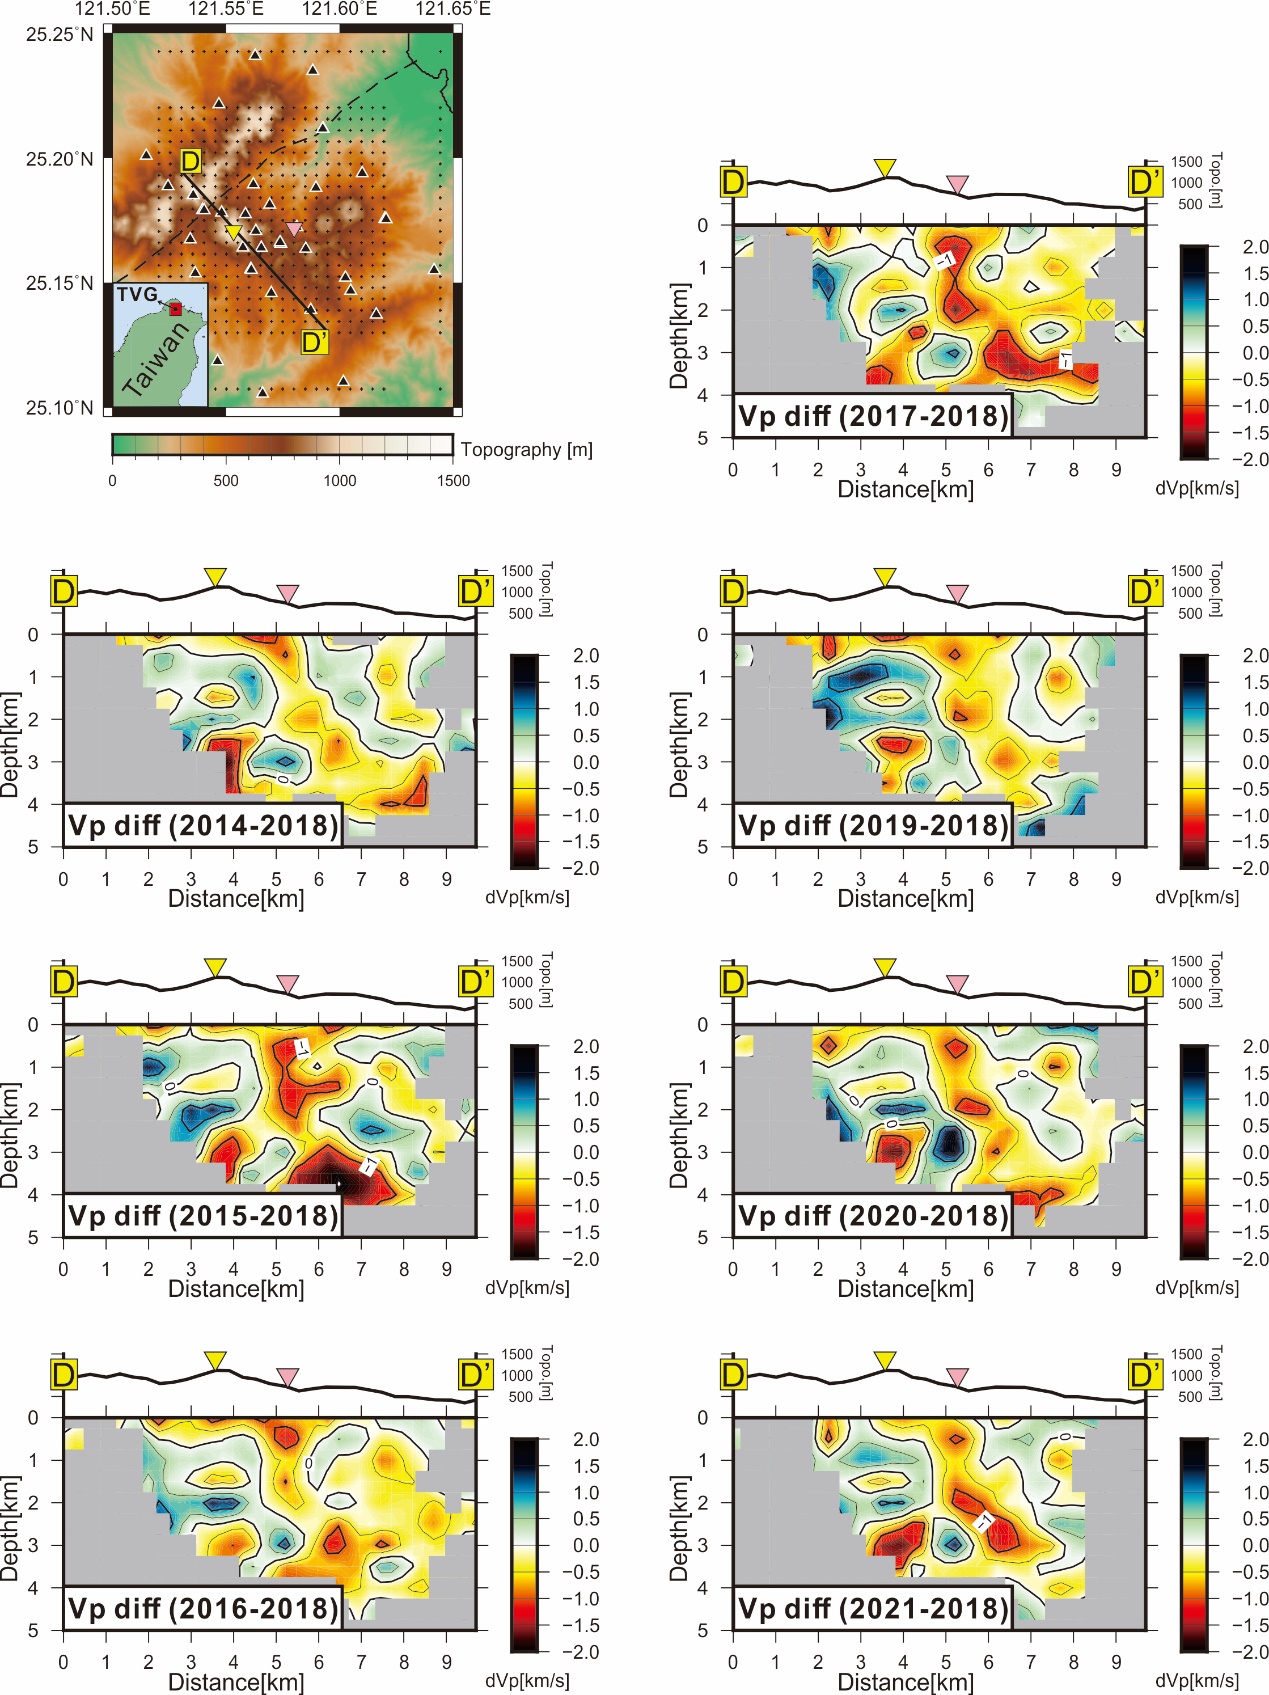
*

**Figure A2.** P-wave velocity differences between 2018 and each of the other years along the D-D’ profile.


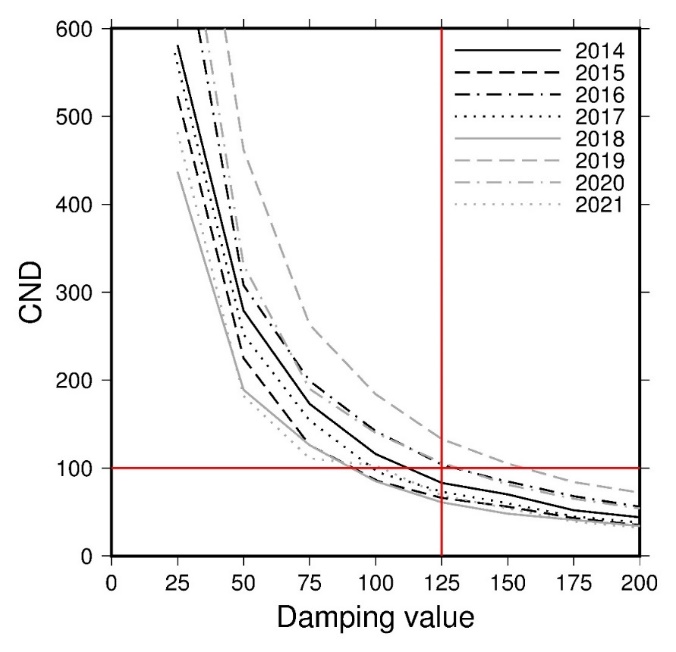


**Figure A3.** The trade-off plots between the damping value and CND in each year between 2014 and 2021.


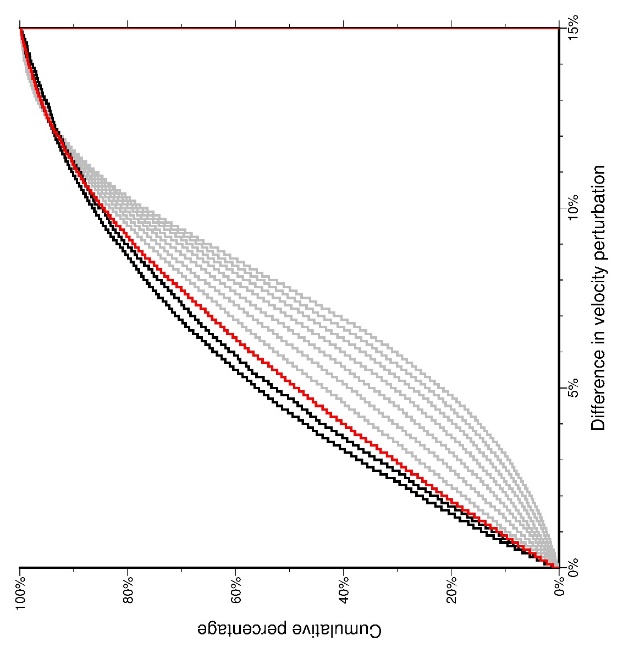


**Figure A4.** Cumulative percentages of the velocity perturbation differences between the predefined checkerboard model and inverted checkerboard tests under a series of smoothing constraints. Differences were calculated for each velocity grid with high ray density (DWS > 5) within a cubic region extending 5 km in longitude, 5 km in latitude, and 2.5 km in depth from the model center, using data collected between 2014 and 2021. The red line corresponds to a smoothing constrain of 1.5, while the gray and black lines represent results for smoothing constraint greater than 2 and less than 1, respectively.


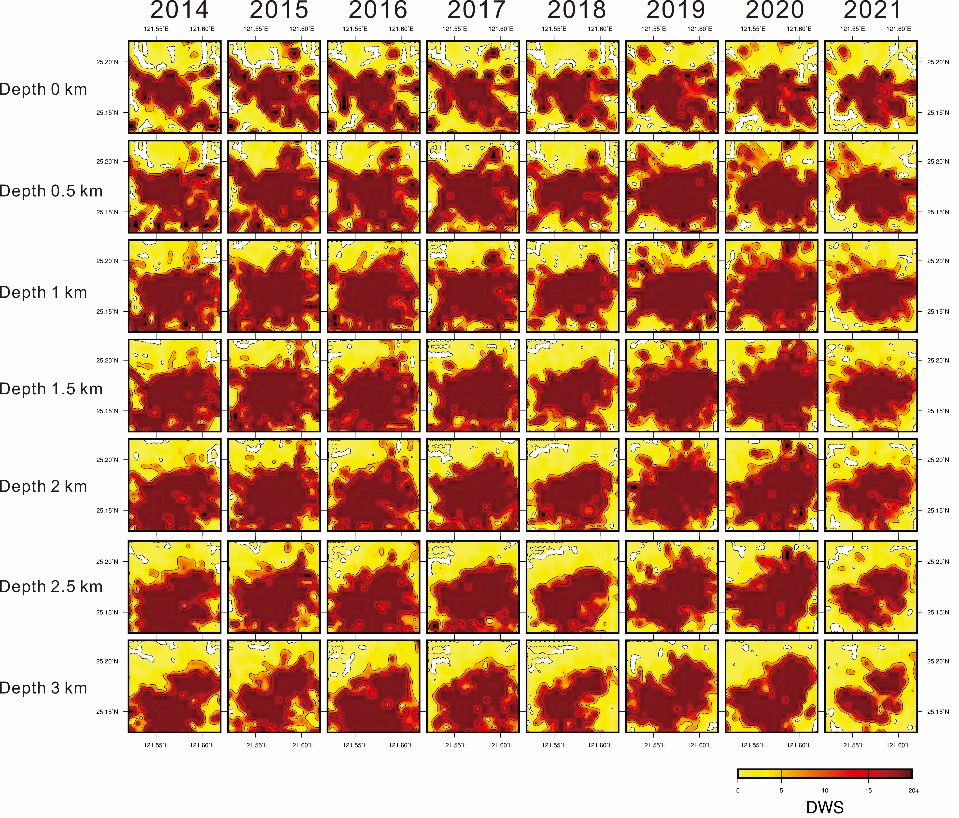


**Figure A5.** The DWS (Derivative Weight Sum) for P-wave at different depths in each year between 2014 and 2021.

**Append Figure Captions**

**Figure A1.** P-wave velocity differences between 2018 and each of the other years along the B-B’ profile.

**Figure A2.** P-wave velocity differences between 2018 and each of the other years along the D-D’ profile.

**Figure A3.** The trade-off plots between the damping value and CND in each year between 2014 and 2021.

**Figure A4.** Cumulative percentages of the velocity perturbation differences between the predefined checkerboard model and inverted checkerboard tests under a series of smoothing constraints. Differences were calculated for each velocity grid with high ray density (DWS > 5) within a cubic region extending 5 km in longitude, 5 km in latitude, and 2.5 km in depth from the model center, using data collected between 2014 and 2021. The red line corresponds to a smoothing constrain of 1.5, while the gray and black lines represent results for smoothing constraint greater than 2 and less than 1, respectively.

**Figure A5.** The DWS (Derivative Weight Sum) for P-wave at different depths in each year between 2014 and 2021.
